# Supplementary material for: Appetitive Motivation and Associated Neurobiology Change Differentially across the Life Course of Mouse Offspring Exposed to Peri- and Postnatal High Fat Feeding
Source: MDPI journal article supplement (doi:10.3390/nu14235161), 2022-12-04
Supplement: s1 [file s1]

**Supplemental Table S1.** Primer sequences used in RT-qPCR analyses.

| Gene         | Forward primer        | Reverse primer         |
|--------------|-----------------------|------------------------|
| <i>Actb</i>  | GATGTATGAAGGCTTTGGTC  | TGTGCACTTTTATTGGTCTC   |
| <i>Cnr1</i>  | AATGCCATTTAGGTGTTCTG  | ATAGGTCTTAGAACCAACCC   |
| <i>Drd1a</i> | ACTGACTCCAGTGTATTCTC  | TTGGATACAGCAAACAACCTC  |
| <i>Drd2</i>  | TTGTTCTTGGTGTGTTTCATC | TATAGATGATGGGGTTCACG   |
| <i>Oprm1</i> | ACTCATGTTGAAAAACCCTG  | CTGTGTTTCAGATGACATTCAC |

Cycling parameters:

1. 95°C for 15 mins
2. 94°C for 15 sec
3. 54°C for 30 sec (*oprm1*, *Drd2*, *Cnr1*, *b-actin*) or 52°C for 30 sec (*Drd1a*)
4. 72°C for 30 sec
5. Repeat steps 2-4 for 40 cycles
6. Hold at 4°C
