# Supplementary material for: Appetitive Motivation and Associated Neurobiology Change Differentially across the Life Course of Mouse Offspring Exposed to Peri- and Postnatal High Fat Feeding
Source: Nutrients. 2022 Dec 4;14(23):5161. doi: 10.3390/nu14235161 (PMC9735866; doi:10.3390/nu14235161)
Supplement: Supplementary file 1 [file nutrients-14-05161-s001.zip]

Archive with 8 entries (8 files):
- Supplemental Figues Legend.pdf
- Supplemental Figure S1.jpg
- Supplemental Figure S2.jpg
- Supplemental Figure S3.jpg
- Supplemental Figure S4.jpg
- Supplemental Figure S5.jpg
- Supplemental Figure S6.jpg
- Supplemental Table S1.pdf
